# Supplementary material for: VCD spectroscopy distinguishes the enamine and iminium ion of a 1,1′-binaphthyl azepine
Source: Royal Society of Chemistry journal article supplement (doi:10.1039/d2cc02863h), 2022-01-01
Supplement: d2cc02863h1.pdf [file d2cc02863h1.pdf]

Supporting information for

# VCD spectroscopy distinguishes the enamine and iminium ion of a 1,1'-binaphthyl azepine

Tino P. Golub<sup>[a]</sup>, Taichi Kano<sup>[b]</sup>, Keiji Maruoka<sup>[c]</sup> and Christian Merten<sup>[a],\*</sup>

- a) Ruhr Universität Bochum  
Fakultät für Chemie und Biochemie, Organische Chemie II  
Universitätsstraße 150  
44801 Bochum, Germany  
christian.merten@ruhr-uni-bochum.de  
[www.mertenlab.de](http://www.mertenlab.de)
- b) Tokyo University of Agriculture and Technology  
Department of Applied Chemistry  
Graduate School of Engineering  
2-24-16 Nakacho, Koganei 184-8588, Japan
- c) Kyoto University  
Graduate School of Pharmaceutical Sciences  
Sakyo, Kyoto 606-8501, Japan

## 1. Experimental and computational details

**Materials.** Catalyst **1** and its iminium salt were prepared according to literature procedures.<sup>1,2</sup>

**IR and VCD spectroscopy.** The IR and VCD spectra were recorded on a Bruker Vertex FT-IR spectrometer equipped with a PMA 50 module for VCD measurements. Samples were held in a transmission cell with BaF<sub>2</sub> windows and 100  $\mu\text{m}$  path length. Concentration are given in the main text. Spectra were recorded at room temperature with 4  $\text{cm}^{-1}$  spectral resolution by accumulating 32 scans for the IR and  $\sim 32000$  scans (4 hours accumulation time) for VCD. Baseline correction of the VCD spectra was done by subtraction of the spectra of the solvent recorded under identical conditions.

**NMR spectroscopy.** <sup>1</sup>H-NMR reaction monitoring was carried out on a 300 MHz Bruker Avance III NMR spectrometer. Concentrations of **1** was 0.5 M with equimolar CH<sub>2</sub>Br<sub>2</sub> as internal standard. Reaction monitoring was carried out at room temperature. Spectra analysis and quantification was carried out using MestReNova 14.

**Computational details.** Details on the conformational analysis can be found in the SI. All geometry optimizations and frequency calculations were carried out at B3LYP/6-31G+(2d,p) level of theory using the Gaussian 09 Rev. E software package.<sup>3</sup> Solvent effects were taken into account implicitly by using the integral equation formalism of the polarizable continuum model (IEFPCM)<sup>4, 5</sup> of chloroform or DMSO. Explicit solvation of **1** with DMSO-d<sub>6</sub> was considered by placing a solvent molecule with its oxygen near the N-H group and re-optimizing the geometry prior to spectra calculations. Relative energy differences and Boltzmann populations generally refer to the zero-point corrected energies of the conformers ( $\Delta E_{\text{ZPC}}$ ). Note that we regularly find  $\Delta E_{\text{ZPC}}$ -derived populations to better explain the experimental signatures than Gibbs Free energies (for a detailed discussion see References <sup>6-9</sup>, for instance). Vibrational line broadening was simulated by assigning a Lorentzian band shape with half-width at half-height of 6  $\text{cm}^{-1}$  to the calculated dipole and rotational strength. The calculated frequencies were scaled by 0.98 to account for anharmonic effects not captured by the harmonic approximation employed in the frequency calculations. Figures were prepared using CYLview.<sup>10</sup>

## 2. NMR spectra of enamine 2

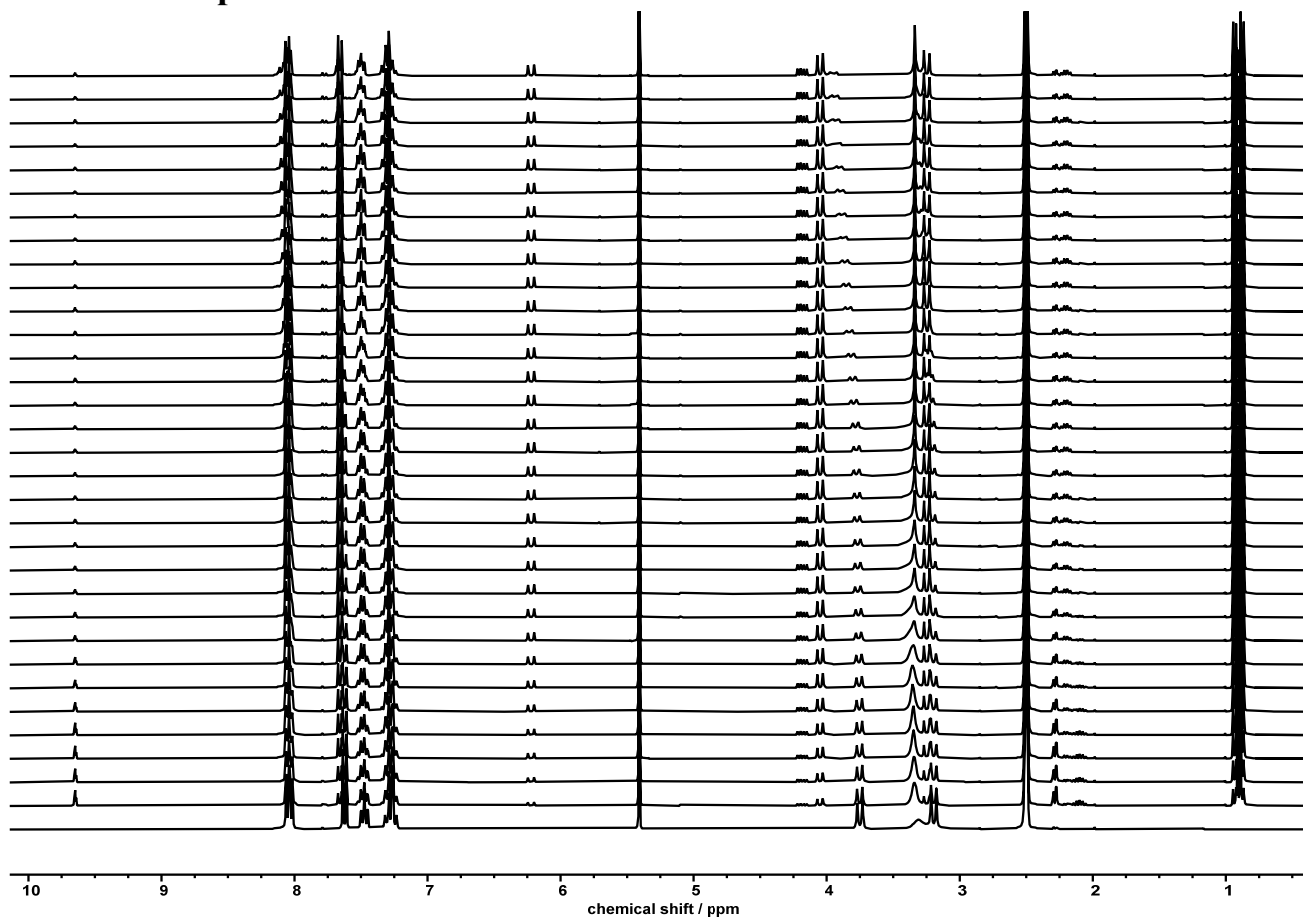

**Figure S1.** Reaction monitoring of enamine formation: catalyst **1** + 1 eq of isovaleraldehyde + 1 eq CH<sub>2</sub>Br<sub>2</sub> as reference (<sup>1</sup>H-NMR, 300 MHz, DMSO-d<sub>6</sub>)

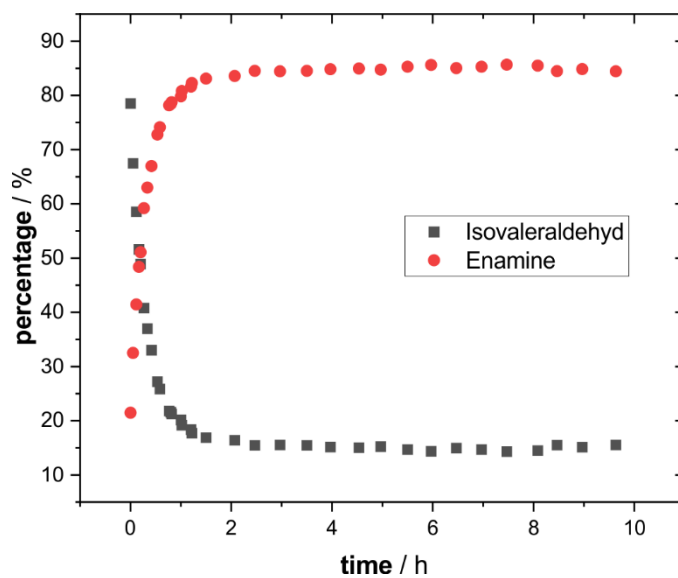

**Figure S2.** Integrals of aldehyde (~9.6 ppm) and enamine (~6.2 ppm) normalized to reference CH<sub>2</sub>Br<sub>2</sub>.

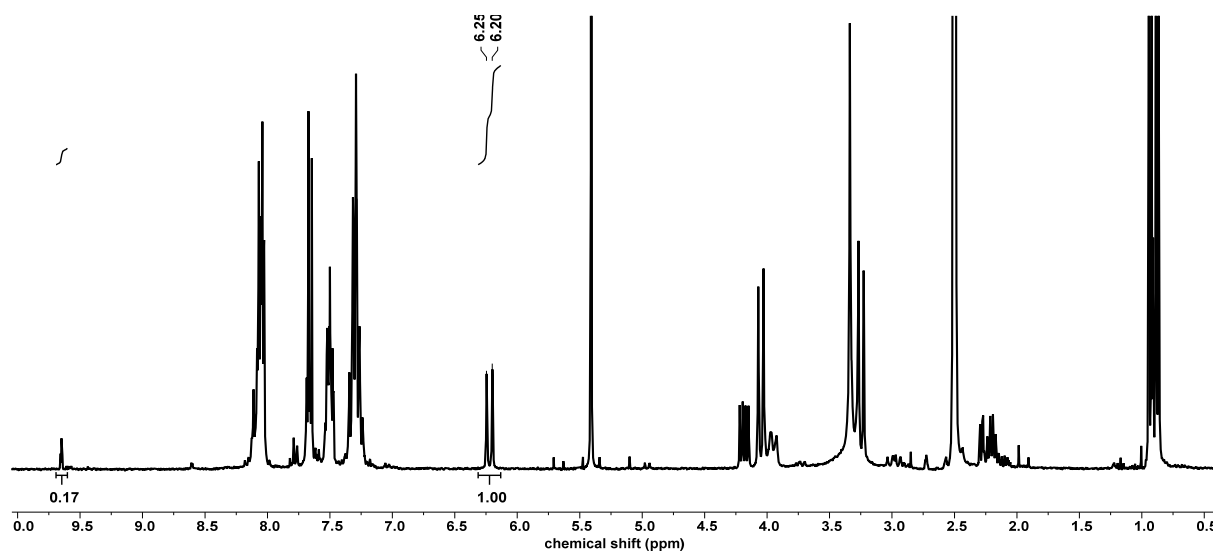

**Figure S3.**  $^1\text{H-NMR}$  of the mixture after  $\sim 9$ hrs of reaction time (top-most spectrum of the reaction monitoring plot in Figure S1)

### 3. Conformational analysis of 2 and 3

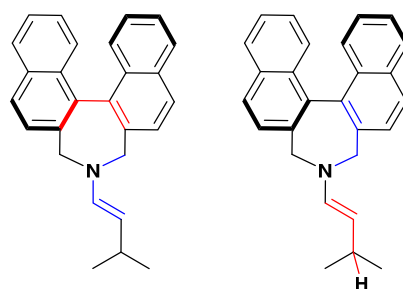

**Table S1.** Geometries, relative energies (zero-point corrected  $\Delta E_{\text{ZPC}}$  and Gibbs Free energy  $\Delta G_{298\text{K}}$  in kcal/mol) and corresponding Boltzmann populations  $\chi$  (in percentage) of the optimized conformations of **2** obtained at B3LYP/6-31G+(2d,p)/IEFPCM(DMSO) level of theory.

|         | C=C-C=C | C=C-C-N | C-N-C=C | N-C=C-C | C=C-C(CH <sub>3</sub> ) <sub>2</sub> -H | $\Delta E_{\text{ZPC}}$ | $\Delta G_{298\text{K}}$ | $\chi(\Delta E)$ | $\chi(\Delta G)$ |
|---------|---------|---------|---------|---------|-----------------------------------------|-------------------------|--------------------------|------------------|------------------|
| AzE_c1  | 54.2    | -70.5   | 8.6     | E       | 3.5                                     | 0.00                    | 0.00                     | 78.8             | 80.7             |
| AzE_c2  | 54.1    | -70.7   | 8.6     | E       | -117.1                                  | 1.28                    | 1.46                     | 8.7              | 6.6              |
| AzE_c3  | 54.1    | -70.6   | 8.4     | E       | 123.3                                   | 1.29                    | 1.46                     | 8.6              | 6.5              |
| AzE_c4  | 54.2    | -72.1   | -154.2  | E       | -2.7                                    | 1.86                    | 1.57                     | 3.2              | 5.4              |
| AzE_c5  | 54.2    | -72.1   | -153.4  | E       | -122.8                                  | 3.19                    | 3.19                     | 0.3              | 0.3              |
| AzE_c6  | 54.1    | -72.2   | -154.5  | E       | 117.5                                   | 3.20                    | 3.18                     | 0.3              | 0.3              |
| AzE_c7  | 53.8    | -71.4   | 7.8     | Z       | -14.8                                   | 5.35                    | 5.20                     | 0.0              | 0.0              |
| AzE_c8  | 54.0    | -73.2   | 161.9   | Z       | -4.0                                    | 5.41                    | 5.28                     | 0.0              | 0.0              |
| AzE_c9  | 53.9    | -72.1   | -163.8  | Z       | 37.8                                    | 7.13                    | 6.82                     | 0.0              | 0.0              |
| AzE_c10 | 54.0    | -73.2   | 155.6   | Z       | -140.9                                  | 9.30                    | 9.42                     | 0.0              | 0.0              |
| AzE_c11 | 54.0    | -73.8   | 128.2   | Z       | 178.7                                   | 10.11                   | 9.81                     | 0.0              | 0.0              |
| AzE_c12 | 53.5    | -72.2   | 24.6    | Z       | 174.6                                   | 11.14                   | 10.66                    | 0.0              | 0.0              |

Relative energies referenced to  $E_{\text{zpc}}(\text{c1}) = -1098.338939$  hartree and  $G(\text{c1}) = -1098.391084$  hartree

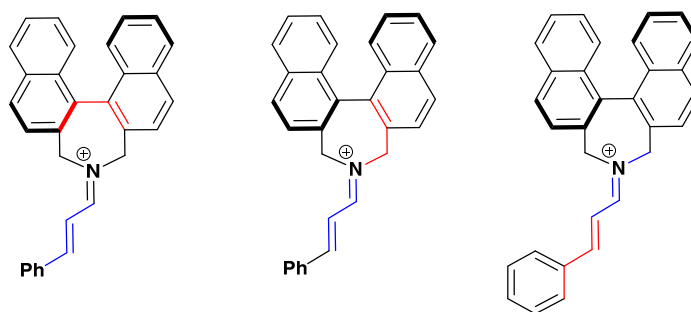

**Table S2.** Geometries, relative energies (zero-point corrected  $\Delta E_{ZPC}$  and Gibbs Free energy  $\Delta G_{298K}$  in kcal/mol) and corresponding Boltzmann populations  $\chi$  (in percentage) of the optimized conformations of **3** obtained at B3LYP/6-31G+(2d,p)/IEFPCM(DMSO) level of theory.

|        | C=C-C=C | C=C-C-N | C-N=C-C | N=C-C=C | C-C=C-C <sub>Ar</sub> | C=C-C <sub>Ar</sub> -C <sub>Ar</sub> | $\Delta E_{ZPC}$ | $\Delta G_{298K}$ | $\chi(\Delta E)$ | $\chi(\Delta G)$ |
|--------|---------|---------|---------|---------|-----------------------|--------------------------------------|------------------|-------------------|------------------|------------------|
| AzI_c1 | 54.0    | -72.5   | 177.2   | 179.6   | 179.4                 | -179.0                               | 0.00             | 0.00              | 100.0            | 99.9             |
| AzI_c2 | 53.9    | -72.3   | -176.3  | -174.0  | 11.4                  | -150.1                               | 5.28             | 4.42              | 0.0              | 0.1              |
| AzI_c3 | 53.7    | -72.8   | 175.2   | -24.5   | -176.2                | 174.1                                | 5.99             | 5.64              | 0.0              | 0.0              |
| AzI_c4 | 53.9    | -71.3   | -173.7  | 34.1    | 175.3                 | -172.9                               | 8.51             | 8.33              | 0.0              | 0.0              |
| AzI_c5 | 53.9    | -71.9   | -177.8  | -44.9   | -9.9                  | -23.6                                | 11.03            | 11.22             | 0.0              | 0.0              |
| AzI_c6 | 53.9    | -68.1   | 2.6     | 54.0    | 7.0                   | -156.0                               | 13.25            | 13.22             | 0.0              | 0.0              |

Relative energies referenced to  $E_{zpc}(c1) = -1249.988727$  hartree and  $G(c1) = -1250.043312$  hartree

#### 4. VCD of catalyst 1

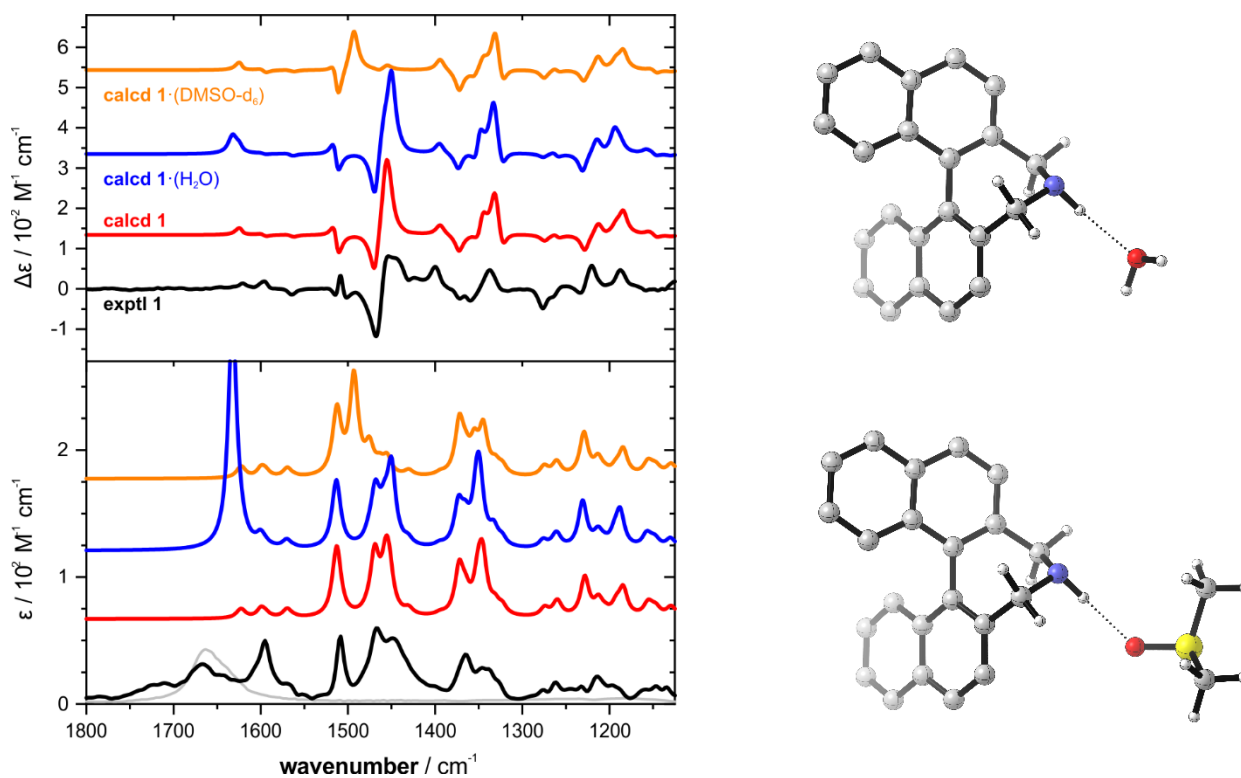

**Figure S4.** IR and VCD spectra of **1** and different clusters as discussed in the main text.

## 5. VCD of catalyst 2

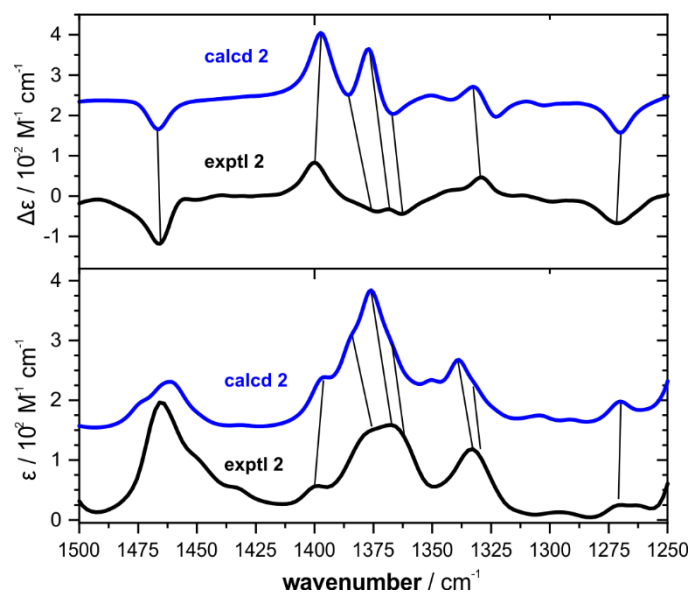

**Figure S5.** Detailed IR and VCD spectra assignment of **2**

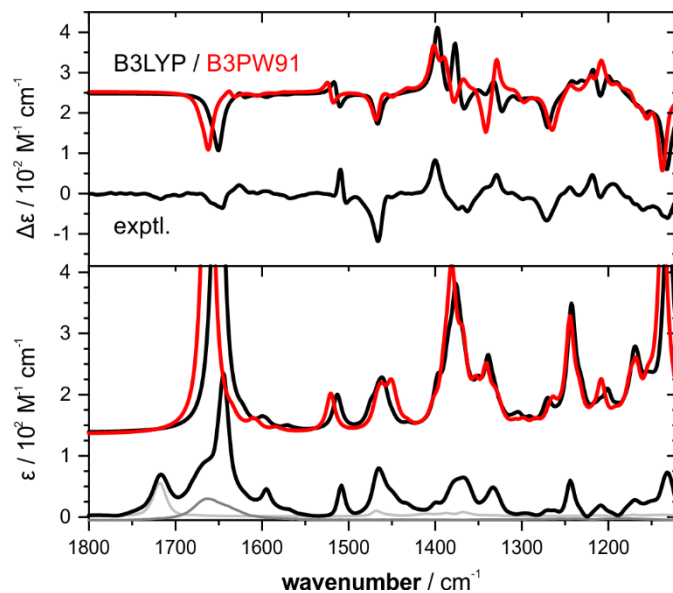

**Figure S6.** Comparison of the computed IR and VCD spectra of **2** obtained using the B3LYP and B3PW91 functionals.

## 6. Cartesian coordinates

### Structure of 1

|   |             |             |             |
|---|-------------|-------------|-------------|
| C | -1.22314800 | 1.59737800  | -0.88355200 |
| C | -0.72574800 | 0.50301400  | -0.18047500 |
| C | -1.62418800 | -0.53877000 | 0.23300300  |
| C | -2.99713300 | -0.48271300 | -0.17778800 |
| C | -3.44617800 | 0.61910300  | -0.95000300 |
| C | -2.58508800 | 1.64064000  | -1.27023600 |
| H | -0.20528700 | -1.65443300 | 1.43621000  |
| C | -1.22731600 | -1.61219200 | 1.07983200  |
| C | -3.88932100 | -1.51583700 | 0.22004200  |
| H | -4.48526900 | 0.65381500  | -1.26391300 |
| H | -2.94278900 | 2.49707700  | -1.83411400 |
| C | -3.46343800 | -2.55059700 | 1.02007200  |
| C | -2.11967900 | -2.58840400 | 1.46373900  |
| H | -4.92260900 | -1.46384700 | -0.11097800 |
| H | -4.15519600 | -3.33011300 | 1.32279500  |
| H | -1.79142200 | -3.39199400 | 2.11544900  |
| C | 2.59242200  | 1.60846900  | 1.28820100  |
| C | 3.44453000  | 0.58097700  | 0.96345200  |
| C | 2.98744900  | -0.51124900 | 0.18184900  |
| C | 1.61503500  | -0.55171800 | -0.23238000 |
| C | 0.72559000  | 0.49591600  | 0.18654000  |
| C | 1.23033700  | 1.58188700  | 0.89817500  |
| H | 4.90432700  | -1.50856200 | 0.11221700  |
| H | 2.95793200  | 2.45710600  | 1.85952500  |
| H | 4.48278300  | 0.60253300  | 1.28162500  |
| C | 3.87135000  | -1.54919300 | -0.22142500 |
| C | 1.21053800  | -1.61596600 | -1.08703200 |
| C | 2.09503900  | -2.59758500 | -1.47574800 |
| C | 3.43818800  | -2.57478300 | -1.02950900 |
| H | 0.18886000  | -1.64694200 | -1.44571700 |
| H | 1.76074700  | -3.39394300 | -2.13327700 |
| H | 4.12363700  | -3.35832600 | -1.33614500 |
| C | -0.30980100 | 2.75866600  | -1.20317000 |
| H | 0.61805500  | 2.37280100  | -1.65181900 |
| H | -0.78013800 | 3.41607200  | -1.94020300 |
| C | 0.32813000  | 2.76237400  | 1.20068500  |
| H | -0.59589100 | 2.41028400  | 1.67104800  |
| H | 0.81194000  | 3.43831700  | 1.91045500  |
| N | -0.03721400 | 3.56325800  | 0.00946700  |
| H | 0.72539900  | 4.20084700  | -0.20505200 |

### Lowest energy conformer of 2

|   |             |             |             |
|---|-------------|-------------|-------------|
| C | 0.10556100  | -1.64276000 | -0.51457800 |
| C | 1.06691600  | -0.75509200 | -0.03942000 |
| C | 2.42330000  | -1.20212700 | 0.12028000  |
| C | 2.78226400  | -2.52041200 | -0.31520200 |
| C | 1.78227700  | -3.36871700 | -0.85506700 |
| C | 0.47727900  | -2.94625900 | -0.92691900 |
| H | 3.17516100  | 0.57212700  | 1.11726000  |
| C | 3.43072800  | -0.41097900 | 0.74158000  |
| C | 4.12507800  | -2.96456800 | -0.17002000 |
| H | 2.05860500  | -4.36482000 | -1.18780200 |
| H | -0.28879500 | -3.61301500 | -1.31104600 |
| C | 5.07745800  | -2.16164200 | 0.41311400  |
| C | 4.71882000  | -0.87639800 | 0.88558800  |
| H | 4.38160900  | -3.96100100 | -0.51804700 |
| H | 6.09789700  | -2.51376400 | 0.52472400  |
| H | 5.46510200  | -0.25399200 | 1.36914600  |
| C | -0.81954000 | 1.98758800  | 1.77501200  |
| C | -0.25020000 | 3.14099400  | 1.29264100  |
| C | 0.74465200  | 3.08369300  | 0.28272900  |
| C | 1.18270700  | 1.80621400  | -0.19969200 |
| C | 0.62967800  | 0.61284400  | 0.37781700  |
| C | -0.39304600 | 0.71662100  | 1.31703000  |
| H | 0.95938200  | 5.22793000  | 0.10728400  |
| H | -1.60407600 | 2.04048300  | 2.52422000  |
| H | -0.57147800 | 4.11080900  | 1.66104300  |
| C | 1.29324800  | 4.26906700  | -0.27869100 |
| C | 2.11857900  | 1.78558200  | -1.27202800 |
| C | 2.61778600  | 2.95180300  | -1.80812400 |
| C | 2.21309900  | 4.20938100  | -1.29975600 |
| H | 2.43473800  | 0.83310900  | -1.67990400 |

|   |             |             |             |
|---|-------------|-------------|-------------|
| H | 3.32511500  | 2.90697100  | -2.63024000 |
| H | 2.61986200  | 5.12112100  | -1.72520000 |
| C | -1.34793300 | -1.23113100 | -0.59381700 |
| H | -1.44084600 | -0.28189800 | -1.14870600 |
| H | -1.90993900 | -1.98324300 | -1.15493100 |
| C | -1.10131100 | -0.53867500 | 1.78559500  |
| H | -0.37337900 | -1.29641500 | 2.08949700  |
| H | -1.72993900 | -0.32332200 | 2.65153400  |
| N | -1.96600700 | -1.10490300 | 0.73141700  |
| C | -3.31196400 | -0.74948100 | 0.75877100  |
| H | -3.68250300 | -0.57378600 | 1.76725100  |
| C | -4.16952200 | -0.65744200 | -0.27590000 |
| H | -3.83007200 | -0.81755200 | -1.29713700 |
| C | -5.64269300 | -0.36902900 | -0.10727500 |
| H | -5.83538800 | -0.19709800 | 0.96080800  |
| C | -6.50581100 | -1.56564800 | -0.55405000 |
| H | -6.33408500 | -1.79439200 | -1.61357100 |
| H | -6.26646300 | -2.46352100 | 0.02558000  |
| H | -7.57381300 | -1.35066600 | -0.42767000 |
| C | -6.05393100 | 0.90265900  | -0.87375200 |
| H | -7.12338600 | 1.11000900  | -0.74866600 |
| H | -5.49260800 | 1.77503800  | -0.52268300 |
| H | -5.85953100 | 0.78868500  | -1.94786000 |

**Lowest energy conformer of 3 (charge +1)**

|   |             |             |             |
|---|-------------|-------------|-------------|
| C | 1.02450000  | -1.21715000 | -1.24793600 |
| C | 1.91946900  | -0.72053400 | -0.30586200 |
| C | 2.80233100  | -1.62965100 | 0.36907300  |
| C | 2.81312100  | -3.00939000 | -0.02161300 |
| C | 1.92805900  | -3.45385800 | -1.03703000 |
| C | 1.03734700  | -2.58418300 | -1.61591100 |
| H | 3.62185000  | -0.20459000 | 1.78552100  |
| C | 3.64070800  | -1.23343900 | 1.44792800  |
| C | 3.69098300  | -3.91382300 | 0.63472200  |
| H | 1.94796000  | -4.49783000 | -1.33379400 |
| H | 0.34081200  | -2.93854800 | -2.36961300 |
| C | 4.50424300  | -3.48982800 | 1.65905100  |
| C | 4.46633300  | -2.13817000 | 2.07599100  |
| H | 3.69780100  | -4.95266700 | 0.31875500  |
| H | 5.16663300  | -4.18989900 | 2.15737200  |
| H | 5.09252500  | -1.81291400 | 2.90035000  |
| C | 0.56034300  | 2.67128300  | 0.71804300  |
| C | 1.65994300  | 3.48918700  | 0.63776800  |
| C | 2.90319600  | 2.98154700  | 0.18293300  |
| C | 3.01514900  | 1.59298400  | -0.15691900 |
| C | 1.87341000  | 0.73796200  | 0.01116000  |
| C | 0.65886800  | 1.29492300  | 0.39920300  |
| H | 3.93440900  | 4.87772000  | 0.30531600  |
| H | -0.39508300 | 3.07546600  | 1.03784200  |
| H | 1.58302700  | 4.53998200  | 0.89902100  |
| C | 4.03158700  | 3.83181700  | 0.03028700  |
| C | 4.25027200  | 1.13494100  | -0.69468400 |
| C | 5.31931500  | 1.98821100  | -0.84834600 |
| C | 5.21709500  | 3.34791100  | -0.47012100 |
| H | 4.34751700  | 0.09970700  | -0.99681800 |
| H | 6.24878400  | 1.61568300  | -1.26645700 |
| H | 6.07091600  | 4.00684300  | -0.58856900 |
| C | -0.01070500 | -0.30007800 | -1.85615100 |
| H | 0.42862900  | 0.64726800  | -2.17858200 |
| H | -0.49600600 | -0.76593300 | -2.71317200 |
| C | -0.58641900 | 0.44218100  | 0.48761500  |
| H | -0.40770300 | -0.46981900 | 1.06567100  |
| H | -1.38373600 | 1.00292100  | 0.97028600  |
| N | -1.06873900 | 0.01744700  | -0.85726000 |
| C | -2.33123400 | -0.14587000 | -1.15131300 |
| H | -2.52780000 | -0.48194700 | -2.16624200 |
| C | -3.45279800 | 0.05451400  | -0.30459100 |
| H | -3.31253700 | 0.35830800  | 0.72399900  |
| C | -4.70227300 | -0.16497400 | -0.81194000 |
| H | -4.76853400 | -0.47951700 | -1.85230900 |
| C | -5.97166500 | -0.03489200 | -0.13287300 |
| C | -7.14438100 | -0.33642400 | -0.85670900 |
| C | -6.09184100 | 0.37486400  | 1.21286200  |
| C | -8.39558300 | -0.23402000 | -0.25903400 |
| H | -7.06256100 | -0.65331700 | -1.89181500 |
| C | -7.34203000 | 0.47639600  | 1.80563200  |
| H | -5.20922700 | 0.61414000  | 1.79508300  |



|   |             |             |             |
|---|-------------|-------------|-------------|
| C | -8.49612100 | 0.17258700  | 1.07272800  |
| H | -9.28868100 | -0.46948200 | -0.82721700 |
| H | -7.42449100 | 0.79211800  | 2.83987600  |
| H | -9.47066200 | 0.25405200  | 1.54251800  |

**Lowest energy conformer of 3 with perchlorate**

|    |             |             |             |
|----|-------------|-------------|-------------|
| C  | -1.33377200 | 1.12282500  | -0.02701200 |
| C  | -2.41607600 | 0.36100300  | 0.40089000  |
| C  | -3.24148200 | 0.85288700  | 1.46776500  |
| C  | -2.99181100 | 2.16403500  | 1.99174300  |
| C  | -1.91705000 | 2.93057300  | 1.47211900  |
| C  | -1.09087300 | 2.41249900  | 0.50548000  |
| H  | -4.45382900 | -0.92958400 | 1.71451700  |
| C  | -4.27241400 | 0.07791700  | 2.06861800  |
| C  | -3.80830300 | 2.66155200  | 3.04328100  |
| H  | -1.73999900 | 3.92562000  | 1.86865100  |
| H  | -0.24653200 | 2.98741300  | 0.13715700  |
| C  | -4.81088200 | 1.89199900  | 3.58507800  |
| C  | -5.03391000 | 0.58189000  | 3.09885600  |
| H  | -3.61459000 | 3.66118500  | 3.42079700  |
| H  | -5.42371600 | 2.28032300  | 4.39204400  |
| H  | -5.81035600 | -0.03173500 | 3.54435500  |
| C  | -1.74398800 | -3.16624000 | -0.83106300 |
| C  | -2.93139700 | -3.52788500 | -1.41719700 |
| C  | -4.00623800 | -2.60639300 | -1.49135100 |
| C  | -3.85628100 | -1.30266400 | -0.91392600 |
| C  | -2.63441200 | -0.97330900 | -0.23380000 |
| C  | -1.58553900 | -1.88780800 | -0.24221100 |
| H  | -5.31835100 | -3.93820200 | -2.57638000 |
| H  | -0.91422000 | -3.86598700 | -0.80831000 |
| H  | -3.05141400 | -4.51477000 | -1.85336400 |
| C  | -5.21687600 | -2.94218900 | -2.15569500 |
| C  | -4.91784200 | -0.37099200 | -1.08713800 |
| C  | -6.07102700 | -0.72057700 | -1.75240200 |
| C  | -6.23175600 | -2.02329900 | -2.28113500 |
| H  | -4.81100600 | 0.63380700  | -0.69820200 |
| H  | -6.86266700 | 0.01118900  | -1.87683300 |
| H  | -7.14930600 | -2.28773100 | -2.79655800 |
| C  | -0.36268000 | 0.55148200  | -1.03419100 |
| H  | -0.88097600 | 0.07983000  | -1.87276500 |
| H  | 0.30911600  | 1.31446800  | -1.42499200 |
| C  | -0.25150900 | -1.54182500 | 0.37985300  |
| H  | -0.37530000 | -1.16823700 | 1.40166700  |
| H  | 0.37627900  | -2.43015700 | 0.41493900  |
| N  | 0.47674500  | -0.49212000 | -0.38444900 |
| C  | 1.77971800  | -0.39566800 | -0.41123600 |
| H  | 2.16833000  | 0.45202600  | -0.97160900 |
| C  | 2.72017500  | -1.26258300 | 0.21008100  |
| H  | 2.38773200  | -2.11882500 | 0.78246700  |
| C  | 4.04586200  | -0.96332100 | 0.08274800  |
| H  | 4.29779300  | -0.06156200 | -0.47256200 |
| C  | 5.17331600  | -1.69591100 | 0.62211400  |
| C  | 6.46456600  | -1.17003400 | 0.41453300  |
| C  | 5.04158800  | -2.90407400 | 1.33860100  |
| C  | 7.58803800  | -1.82550000 | 0.90835600  |
| H  | 6.57526400  | -0.24052200 | -0.13488000 |
| C  | 6.16435900  | -3.55651500 | 1.82876700  |
| H  | 4.06142100  | -3.33534500 | 1.50857300  |
| C  | 7.43988200  | -3.01940200 | 1.61600300  |
| H  | 8.57495800  | -1.40748700 | 0.74240500  |
| H  | 6.05211800  | -4.48567100 | 2.37724500  |
| H  | 8.31391700  | -3.53398600 | 2.00163500  |
| Cl | 3.06567400  | 3.19059100  | -1.49111300 |
| O  | 2.36092100  | 2.20727500  | -2.35633400 |
| O  | 2.06719500  | 4.00916100  | -0.77827900 |
| O  | 3.92434500  | 4.04732300  | -2.32014200 |
| O  | 3.88920700  | 2.44797700  | -0.51013400 |

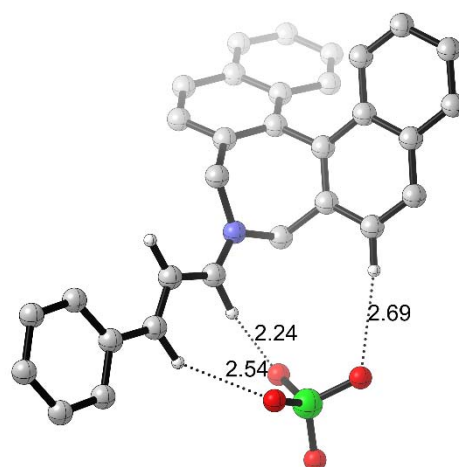

## 7. References

1. T. Ooi, M. Kameda and K. Maruoka, *J. Am. Chem. Soc.*, 2003, **125**, 5139-5151.
2. M. C. Holland, J. B. Metternich, C. Mück-Lichtenfeld and R. Gilmour, *Chem. Commun.*, 2015, **51**, 5322-5325.
3. *Gaussian 09, Rev E.01*, M. J. Frisch, G. W. Trucks, H. B. Schlegel, G. E. Scuseria, M. A. Robb, J. R. Cheeseman, G. Scalmani, V. Barone, B. Mennucci, G. A. Petersson, H. Nakatsuji, M. Caricato, X. Li, H. P. Hratchian, A. F. Izmaylov, J. Bloino, G. Zheng, J. L. Sonnenberg, M. Hada, M. Ehara, K. Toyota, R. Fukuda, J. Hasegawa, M. Ishida, T. Nakajima, Y. Honda, O. Kitao, H. Nakai, T. Vreven, J. J. A. Montgomery, J. E. Peralta, F. Ogliaro, M. Bearpark, J. J. Heyd, E. Brothers, K. N. Kudin, V. N. Staroverov, T. Keith, R. Kobayashi, J. Normand, K. Raghavachari, A. Rendell, J. C. Burant, S. S. Iyengar, J. Tomasi, M. Cossi, N. Rega, J. M. Millam, M. Klene, J. E. Knox, J. B. Cross, V. Bakken, C. Adamo, J. Jaramillo, R. Gomperts, R. E. Stratmann, O. Yazyev, A. J. Austin, R. Cammi, C. Pomelli, J. W. Ochterski, R. L. Martin, K. Morokuma, V. G. Zakrzewski, G. A. Voth, P. Salvador, J. J. Dannenberg, S. Dapprich, A. D. Daniels, O. Farkas, J. B. Foresman, J. V. Ortiz, J. Cioslowski and D. J. Fox, Wallingford CT, USA, 2013
4. B. Mennucci, C. Cappelli, R. Cammi and J. Tomasi, *Chirality*, 2011, **23**, 717-729.
5. J. Tomasi, B. Mennucci and R. Cammi, *Chem. Rev.*, 2005, **105**, 2999-3094.
6. K. Scholten and C. Merten, *Phys. Chem. Chem. Phys.*, 2022, **24**, 3611-3617.
7. K. Scholten and C. Merten, *Phys. Chem. Chem. Phys.*, 2022, **24**, 4042-4050.
8. M. Kemper, E. Engelage and C. Merten, *Angew. Chem. Int. Ed.*, 2021, **60**, 2958-2962.
9. K. Bünnemann and C. Merten, *Phys. Chem. Chem. Phys.*, 2017, **19**, 18948-18956.
10. *CYLview 1.0b*, C. Y. Legault, Université de Sherbrooke, 2009
